# Supplementary material for: Principal component analysis based unsupervised feature extraction applied to budding yeast temporally periodic gene expression
Source: PubMed Central journal article supplement (PMC4928327; doi:10.1186/s13040-016-0101-9), 2016-06-29

**(A):  $A=1$** 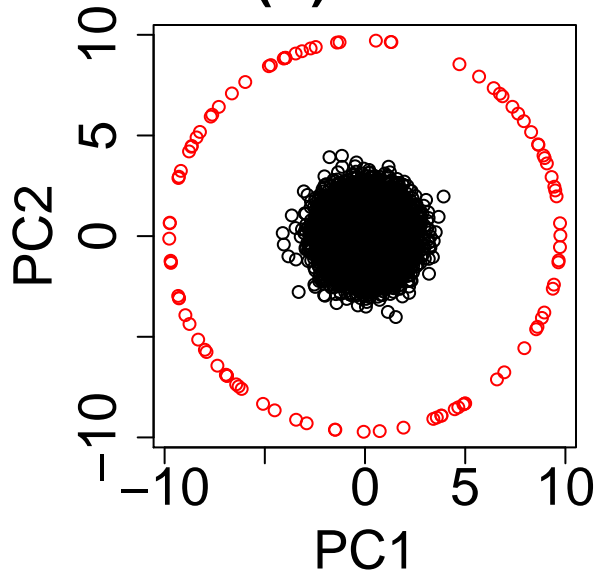**(B)**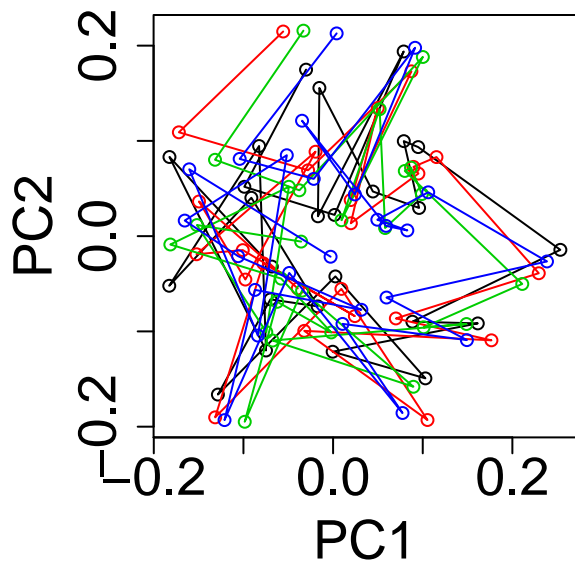**(C)**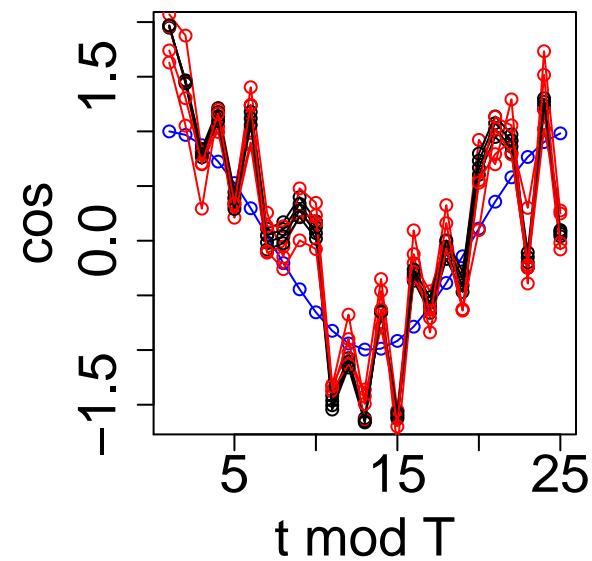**(D)**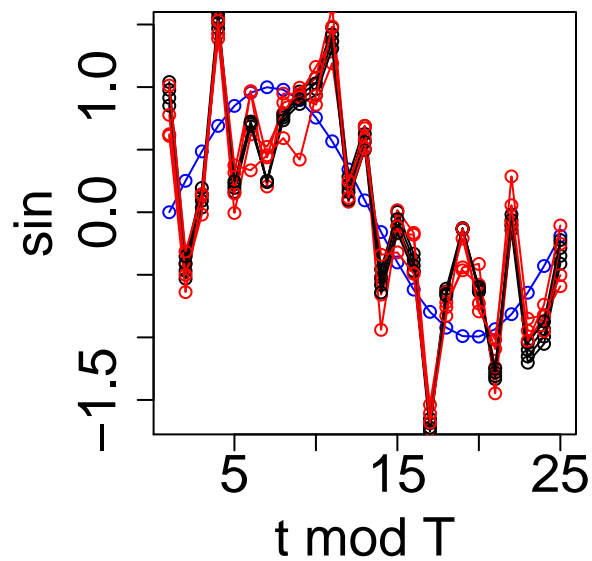

**(A):  $A = 2$** 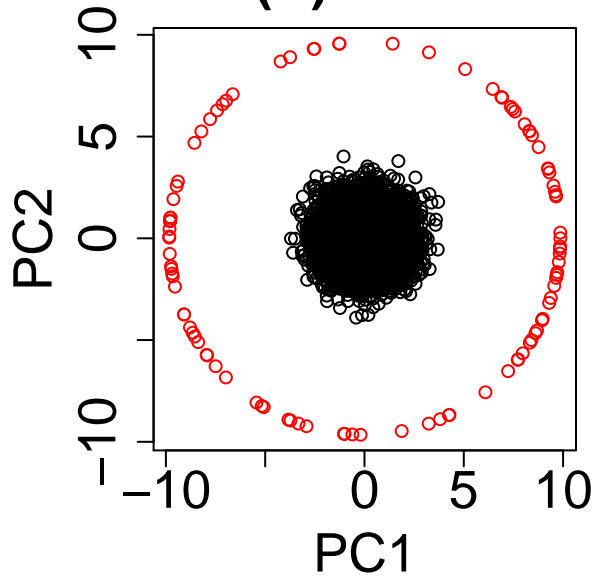**(B)**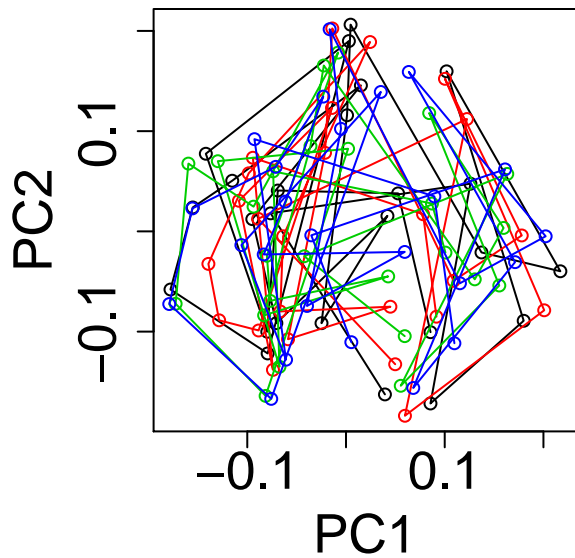**(C)**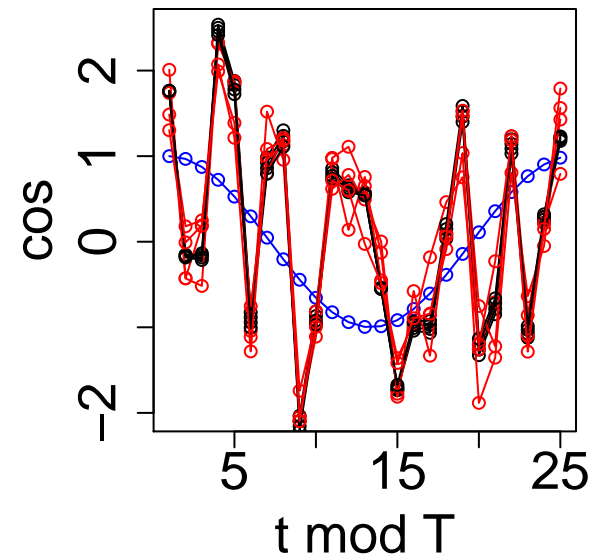**(D)**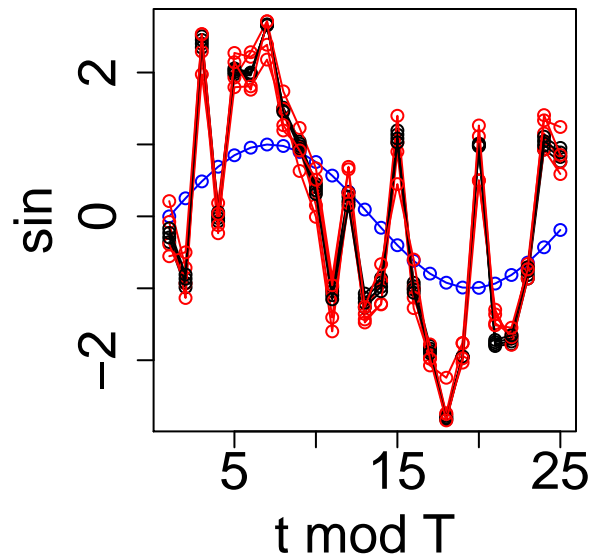

**(A):  $A = 3$** 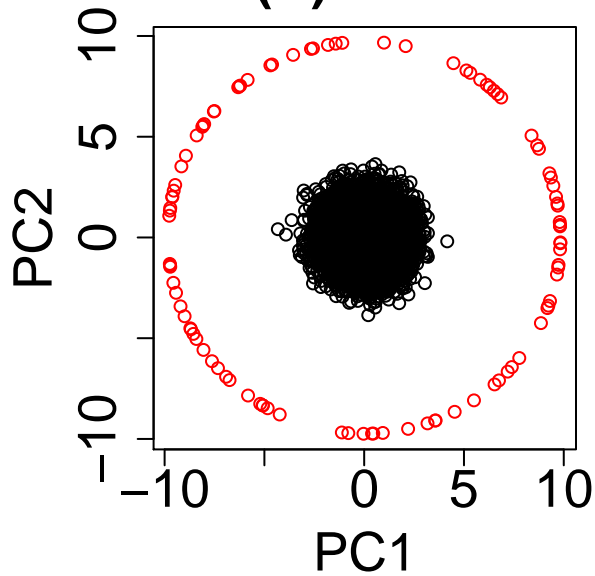**(B)**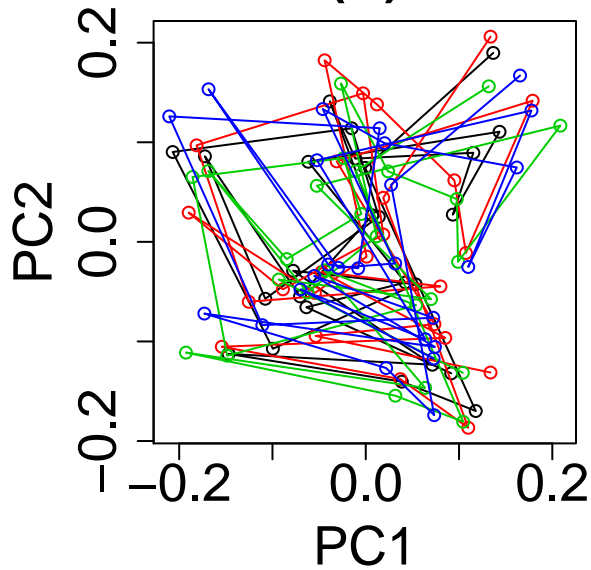**(C)**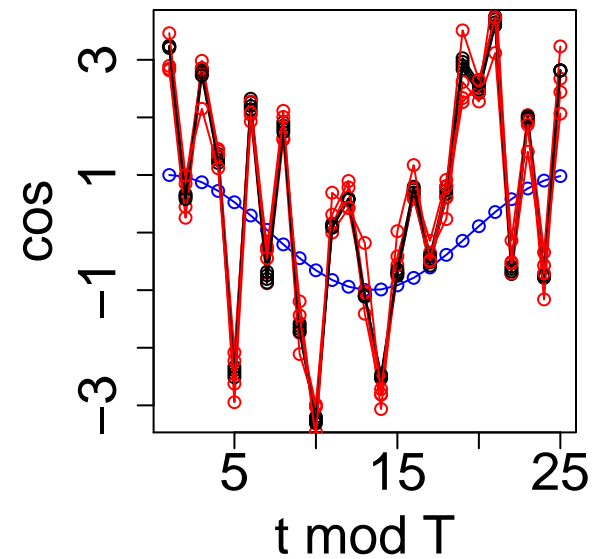**(D)**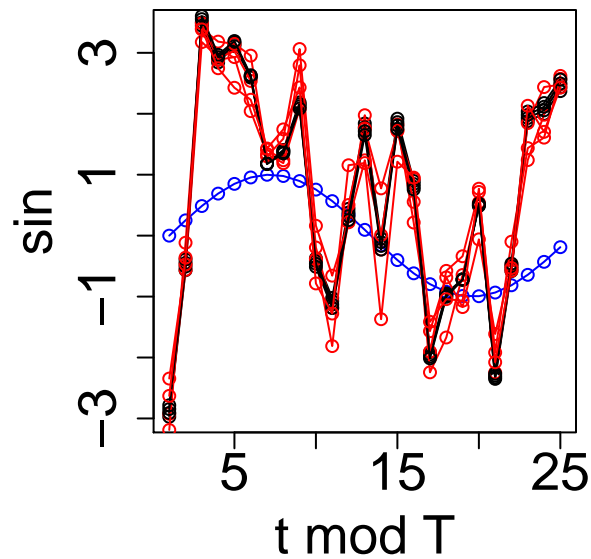

**(A):  $A = 4$** 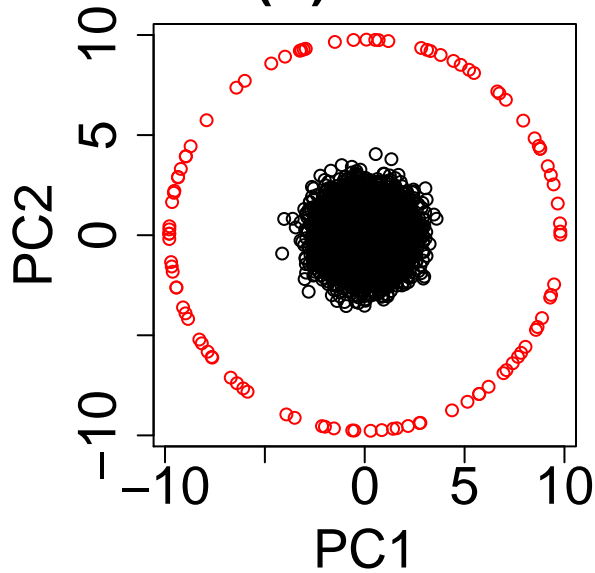**(B)**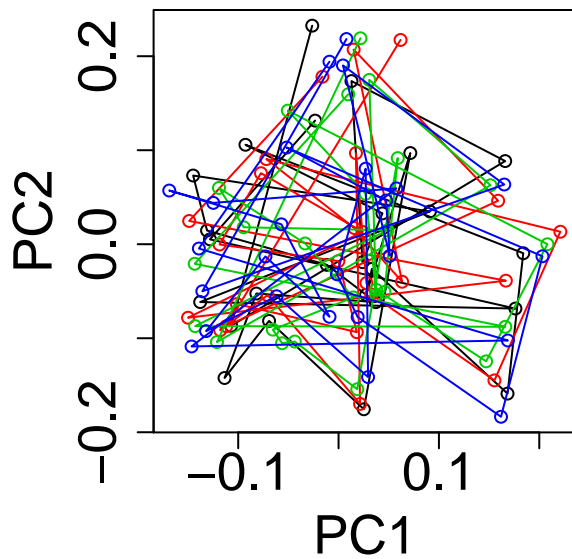**(C)**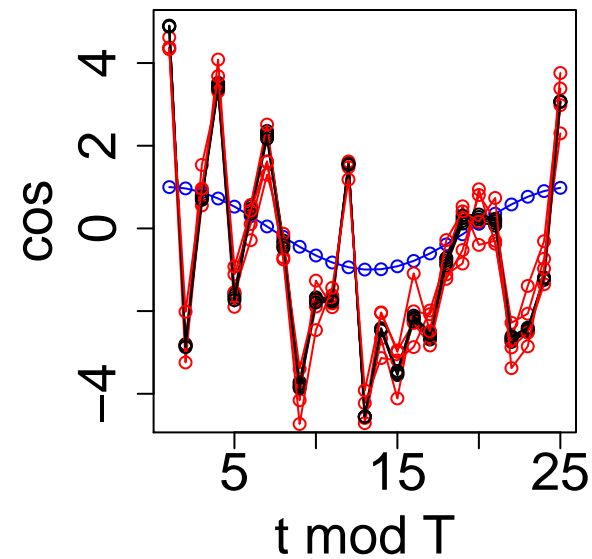**(D)**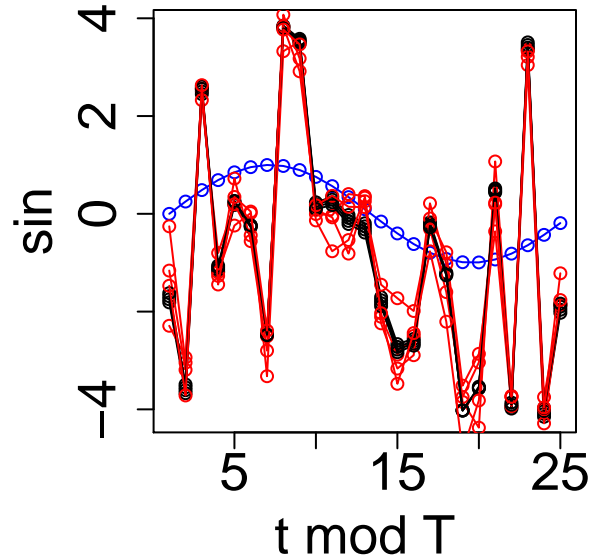

**(A):  $A=5$** 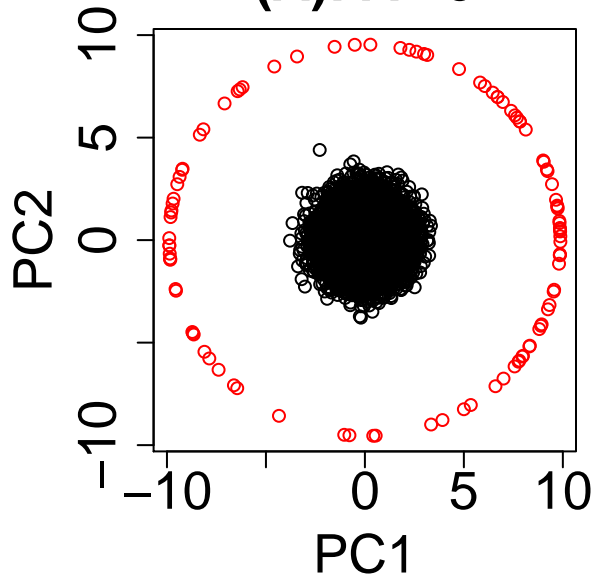**(B)**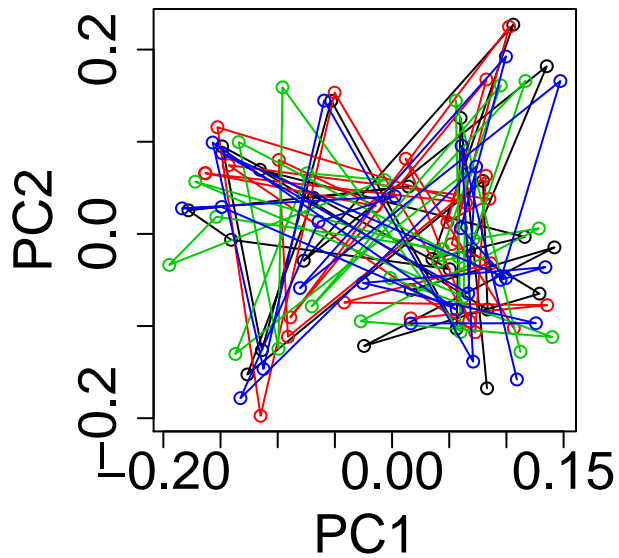**(C)**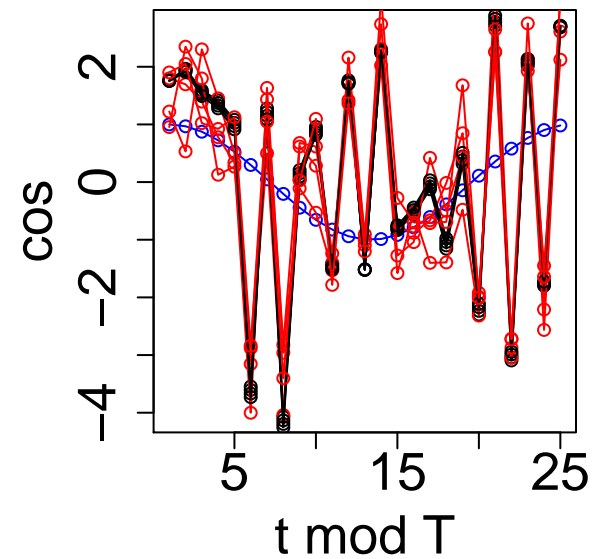**(D)**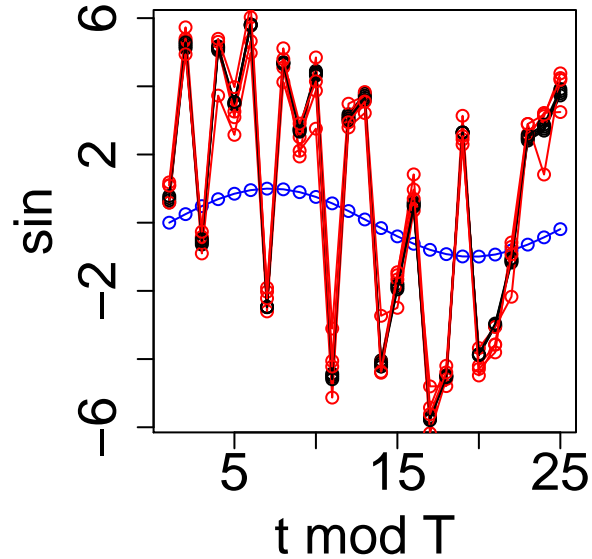

**(A):  $A = 6$** 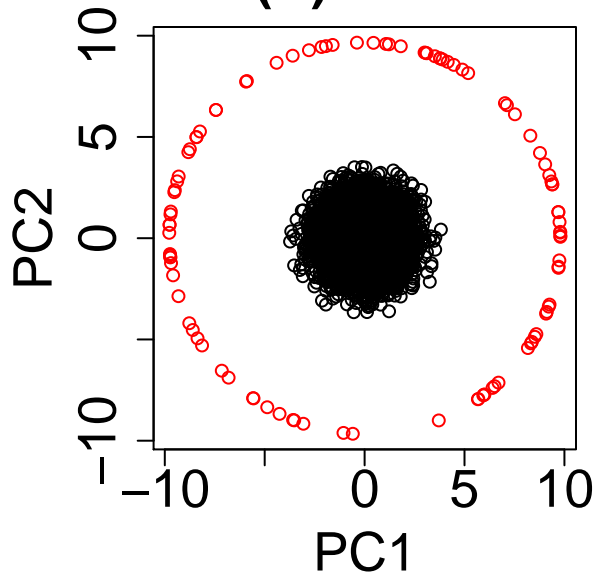**(B)**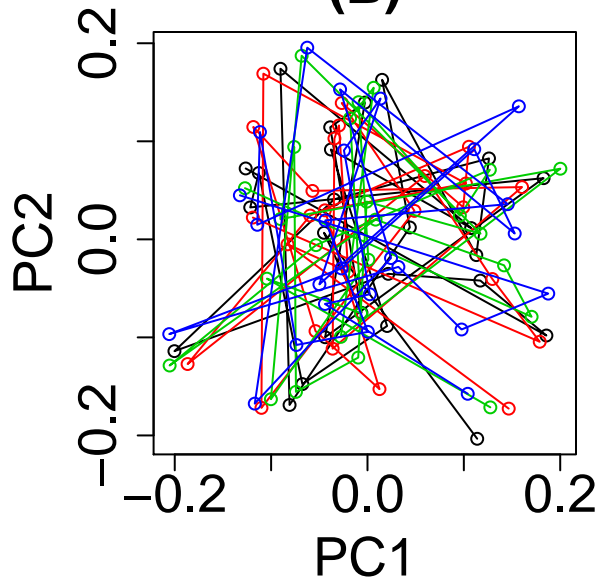**(C)**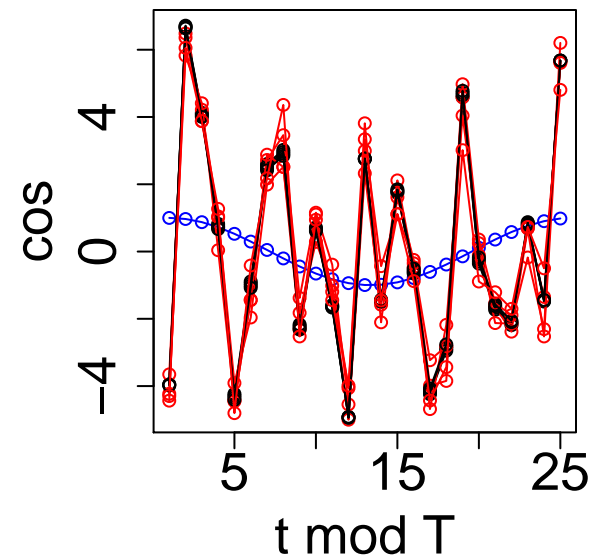**(D)**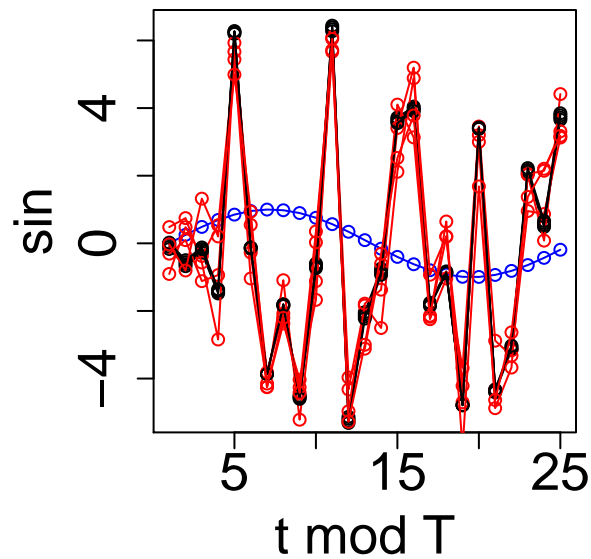

Supplement: 13040_2016_101_MOESM9_ESM.pdf [file 13040_2016_101_MOESM9_ESM.pdf]
