# Supplementary material for: Principal component analysis based unsupervised feature extraction applied to budding yeast temporally periodic gene expression
Source: PubMed Central journal article supplement (PMC4928327; doi:10.1186/s13040-016-0101-9), 2016-06-29

# Classification

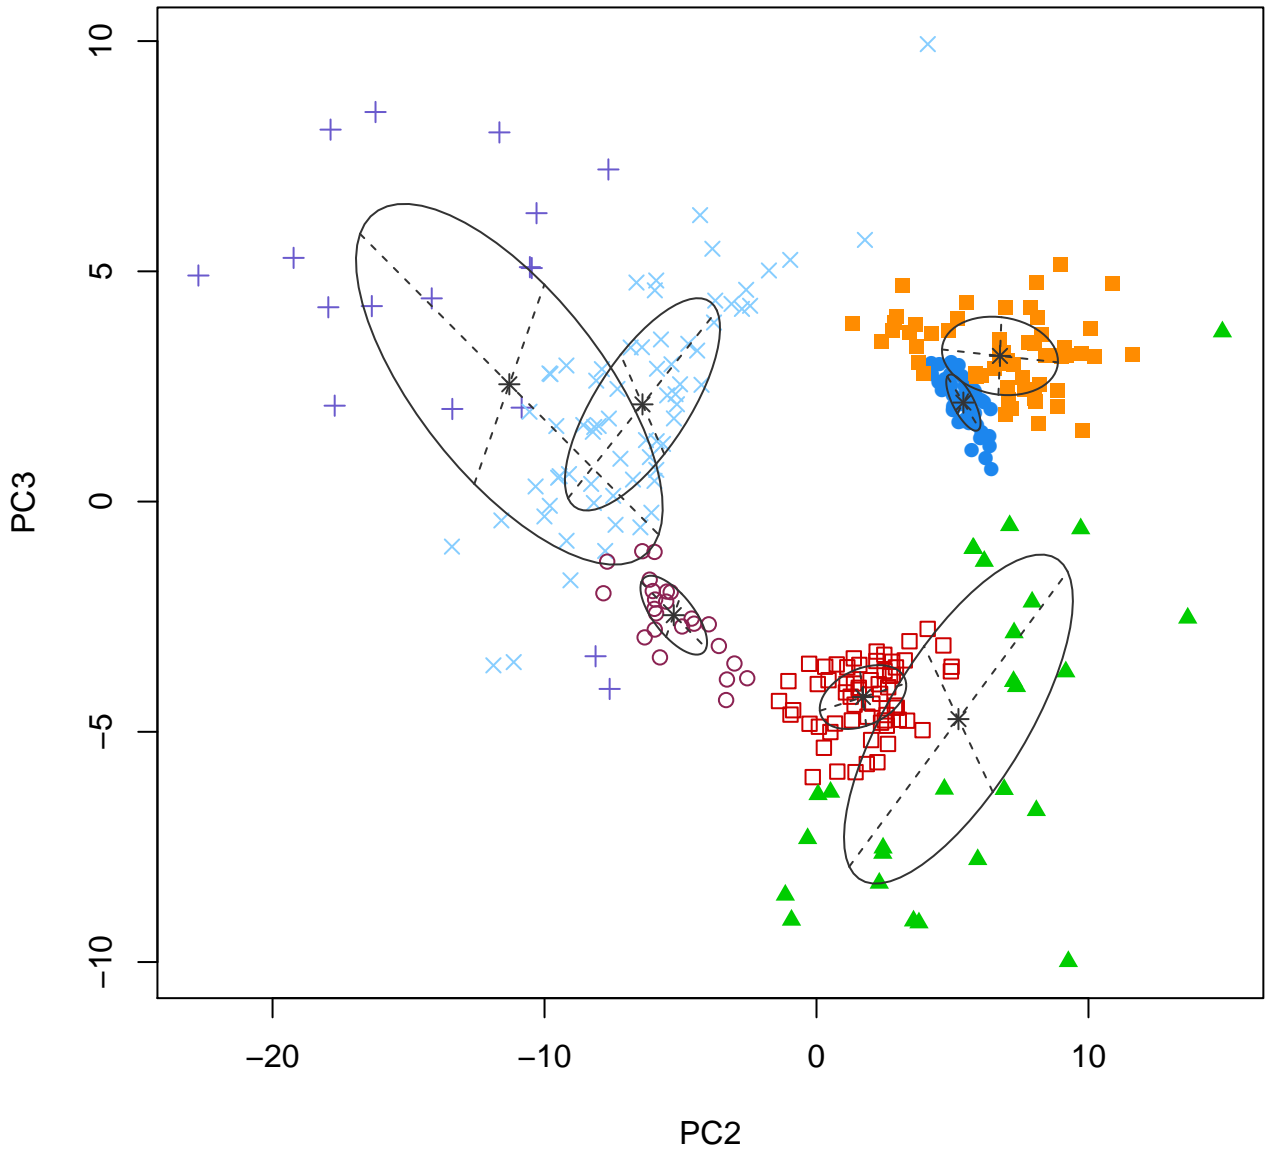

# Classification Uncertainty

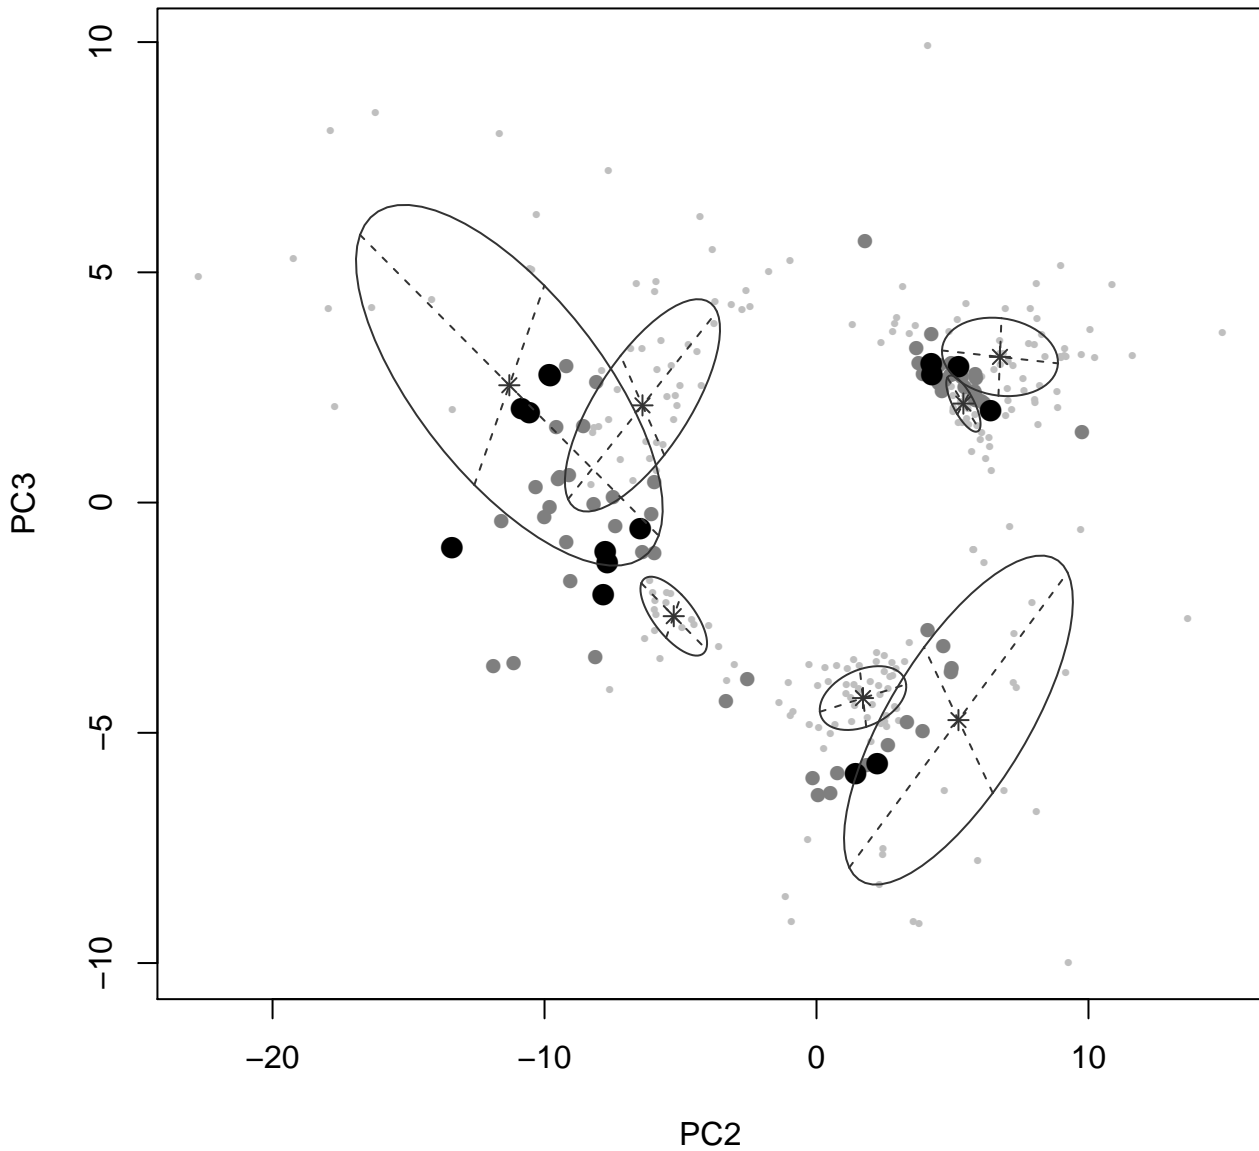

# log Density Contour Plot

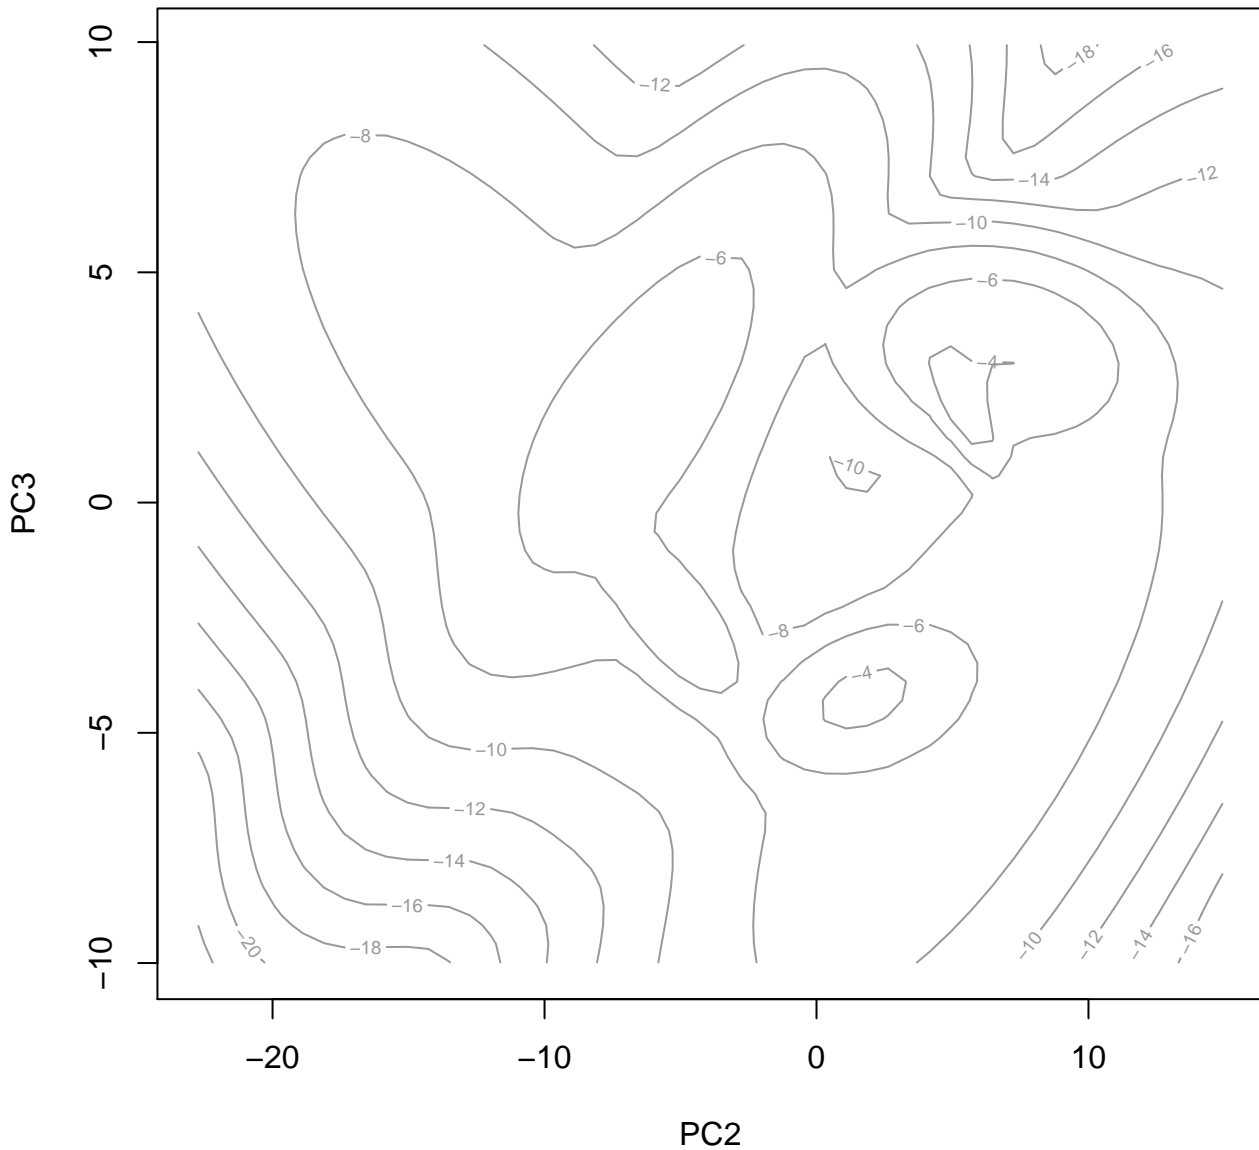

Supplement: 13040_2016_101_MOESM10_ESM.pdf [file 13040_2016_101_MOESM10_ESM.pdf]
